# Supplementary material for: A new sequence logo plot to highlight enrichment and depletion
Source: PubMed Central journal article supplement (PMC6288878; doi:10.1186/s12859-018-2489-3), 2018-12-10
Supplement: 12859_2018_2489_MOESM1_ESM.pdf [file 12859_2018_2489_MOESM1_ESM.pdf]

## 392 Supplementary Methods

### 393 Empirical Bayes stabilization of $\tilde{\mathbf{r}}$

Let  $\mathbf{p} = (p_1, \dots, p_M)$  denote the vector of frequencies of  $M$  elements  $C_1, \dots, C_M$  (characters or strings) at a particular position  $i$  of a logo plot. Assume that  $\mathbf{p}$  is to be estimated from  $N_P$  observed symbols at that position, and let  $\mathbf{x} = (x_1, x_2, \dots, x_M)$  denote the observed counts of each symbol (so  $\sum_{m=1}^M x_j = N_P$ ). Assume a multinomial distribution for  $\mathbf{x}$ :

$$\mathbf{x} \sim \text{Mult}(N_P, \mathbf{p}). \quad (9)$$

Similarly, let  $\mathbf{q} = (q_1, \dots, q_M)$  denote the vector of background frequencies of the  $M$  elements, and assume  $\mathbf{q}$  is to be estimated from  $N_Q$  observed symbols. Let  $\mathbf{y} = (y_1, y_2, \dots, y_M)$  denote the observed counts of each symbol (so  $\sum_{m=1}^M y_j = N_Q$ ) and

$$\mathbf{y} \sim \text{Mult}(N_Q, \mathbf{q}). \quad (10)$$

Our aim is to estimate  $\tilde{r}_j = \log(p_j/q_j)$  from these data  $\mathbf{x}, \mathbf{y}$ . By assuming  $N_P$  and  $N_Q$  are large, we can use a Poisson approximation to the Multinomial distributions in Equations (9) and (10):

$$x_j \sim \text{Poi}(N_P p_j) \quad y_j \sim \text{Poi}(N_Q q_j). \quad (11)$$

Assuming  $\mathbf{x}$  and  $\mathbf{y}$  are independent, Equation (11) implies

$$x_j | (x_j + y_j) \sim \text{Bin}(x_j + y_j, \rho_j) \quad \text{where} \quad \rho_j := \frac{N_P p_j}{N_P p_j + N_Q q_j} \quad (12)$$

Note that

$$\alpha_j := \log(\rho_j/(1 - \rho_j)) = \log(N_P/N_Q) + \tilde{r}_j, \quad (13)$$

so estimating  $\tilde{r}_j$  boils down to estimating  $\alpha_j$ .

The maximum likelihood estimate of  $\alpha_j$ , given  $\mathbf{x}, \mathbf{y}$  and using the likelihood implied by (12), is simply  $\log(x_j/y_j)$ , which is infinite when  $x_j$  or  $y_j$  is 0. One way to avoid this infinite estimate is to use Tukey's modification [25]:

$$\hat{\alpha}_j := \begin{cases} \log((x_j + 0.5)/(y_j + 0.5)) - 0.5 & \text{if } x_j = 0 \\ \log(x_j/y_j) & \text{if } x_j = 1, 2, \dots, N_j - 1 \\ \log((x_j + 0.5)/(y_j + 0.5)) + 0.5 & \text{if } x_j = N_j \end{cases} \quad (14)$$

where  $N_j = x_j + y_j$ . However, this estimate still suffers from high variance when  $x_j, y_j$  are 0. To stabilize these estimates we use the Empirical Bayes (EB) approach from Xing and Stephens [26], which in turn is based on methods from [12]. In brief the method combines the estimates (14) with their approximate standard errors [25], given by

$$s_j := \sqrt{V^*(\hat{\alpha}_j) - 0.5 \{V_3(\hat{\alpha}_j)\}^2 \left\{ V_3(\hat{\alpha}_j) - \frac{4}{N_j} \right\}} \quad (15)$$

where

$$V_3(\hat{\alpha}_j) := \frac{N_j + 1}{N_j} \left( \frac{1}{x_j + 1} + \frac{1}{y_j + 1} \right) \quad V^*(\hat{\alpha}_j) := V_3(\hat{\alpha}_j) \left\{ 1 - \frac{2}{N_j} + \frac{V_3(\hat{\alpha}_j)}{2} \right\}. \quad (16)$$

395 The EB approach from [12], implemented in the **ashr** package, takes as input any set  
 396 of estimates and corresponding standard errors, and outputs shrunken (stabilized)  
 397 estimates. We apply this approach to the estimates (14) and their standard errors  
 398 (15) to obtain stabilized estimates,  $\alpha_j^*$ , for  $\alpha_j$ . (Note that while [12] focuses on the  
 399 case where the prior distribution is unimodal about 0, the software has the option  
 400 to estimate the location of the mode, and we use this option here.)

Finally, using (13), we obtain

$$\tilde{r}_j = \alpha_j^* - \log(N_P/N_Q). \quad (17)$$

401 Median minimizes the sum of absolute deviations

402 Say we have  $n$  points  $x_1, x_2, \dots, x_n$ . We order them  $x_{(1)} < x_{(2)} < \dots < x_{(n)}$ . Suppose  
 403 we want to find the  $a$  that minimizes

$$\underset{a}{\operatorname{argmin}} \sum_{i=1}^n |x_i - a|$$

404 We show that when  $n$  is odd, say  $n = 2m + 1$ , then the  $a$  that minimizes the  
 405 above quantity is  $a^* = x_{(m+1)}$ , which is the median point. If  $n$  is even, say  $n = 2m$ ,  
 406 then the minimizing  $a^*$  could be any value between  $x_{(m)}$  and  $x_{(m+1)}$ , the interval  
 407 between the two middle points.

The subgradient of  $\sum_{i=1}^n |x_i - a|$  with respect to  $a$  is given by

$$\delta(a) = \sum_{i=1}^n \operatorname{sgn}(x_i - a) \quad (18)$$

408 The minimizing value of  $a$  is the one for which  $\delta(a)$  is equal to 0.

409 When  $n = 2m + 1$ ,  $\delta(a)$  equals 0 when  $a$  is equal to the middlemost  $x_i$  value,  
 410 namely  $x_{(m+1)}$ , as  $\text{sgn}(x_{(i)} - x_{(m+1)}) = -1$  for the  $m$  values such that  $i \leq m$   
 411 and  $\text{sgn}(x_{(i)} - x_{(m+1)}) = 1$  for the  $m$  values from  $i = m + 2, \dots, 2m + 1$ , and  
 412  $\text{sgn}(x_{(m+1)} - x_{(m+1)}) = 0$

$$\delta(a) = \sum_{i=1}^m \text{sgn}(x_{(i)} - a) + \text{sgn}(x_{(m+1)} - a) \sum_{i=m+2}^{2m+1} \text{sgn}(x_{(i)} - a) = -m + 0 + m = 0$$

413 When  $n = 2m$ ,  $\delta(a)$  equals to 0 when  $a$  is any value between  $x_{(m)}$  and  $x_{(m+1)}$ .  
 414 because when  $x_{(m)} < a < x_{(m+1)}$ , for the  $m$  values  $i \leq m$  we have  $\text{sgn}(x_{(i)} - a) = -1$   
 415 and for the remaining  $m$  values  $i = m + 1, \dots, 2m$  we have  $\text{sgn}(x_{(i)} - a) = +1$ , so

$$\delta(a) = \sum_{i=1}^m \text{sgn}(x_{(i)} - a) + \sum_{i=m+1}^{2m} \text{sgn}(x_{(i)} - a) = -m + m = 0$$

416 The above analysis only shows that the median is a local optima. That it is a  
 417 minima is easily seen by choosing  $a$  to be outside the range of the  $x_i$ 's for which the  
 418 sum of absolute deviations will be greater than any  $a$  inside the range. The fact that  
 419 this local minima is global follows from the convexity of the function  $\sum_{i=1}^n |a - x_i|$   
 420 with respect to  $a$  ( $f(y) = |y|$  is convex and sum of convex functions is convex).
