# Supplementary material for: A new sequence logo plot to highlight enrichment and depletion
Source: PubMed Central journal article supplement (PMC6288878; doi:10.1186/s12859-018-2489-3), 2018-12-10

## 421 Supplementary Figures

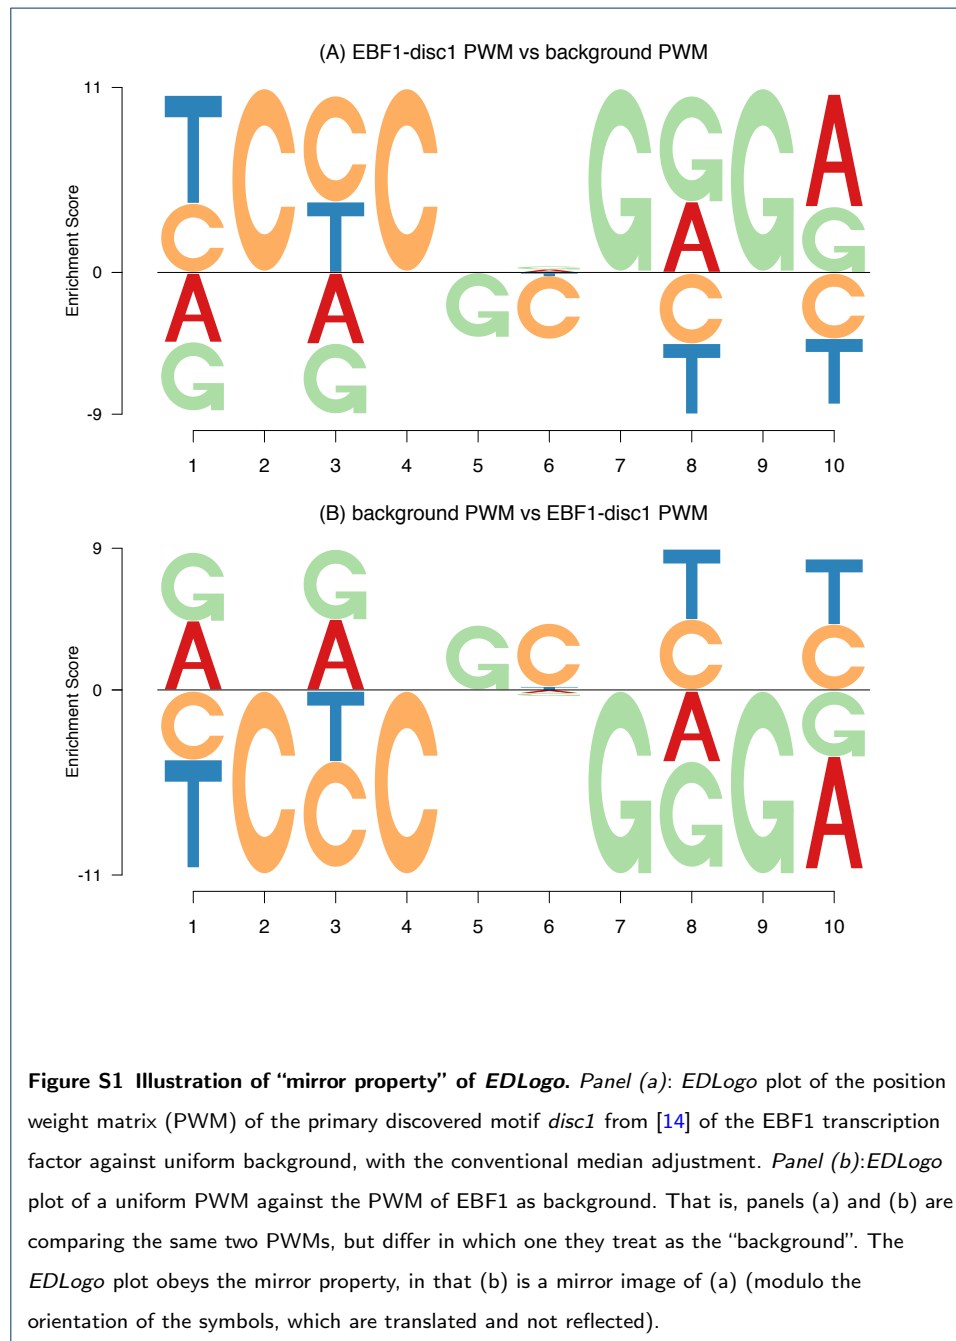

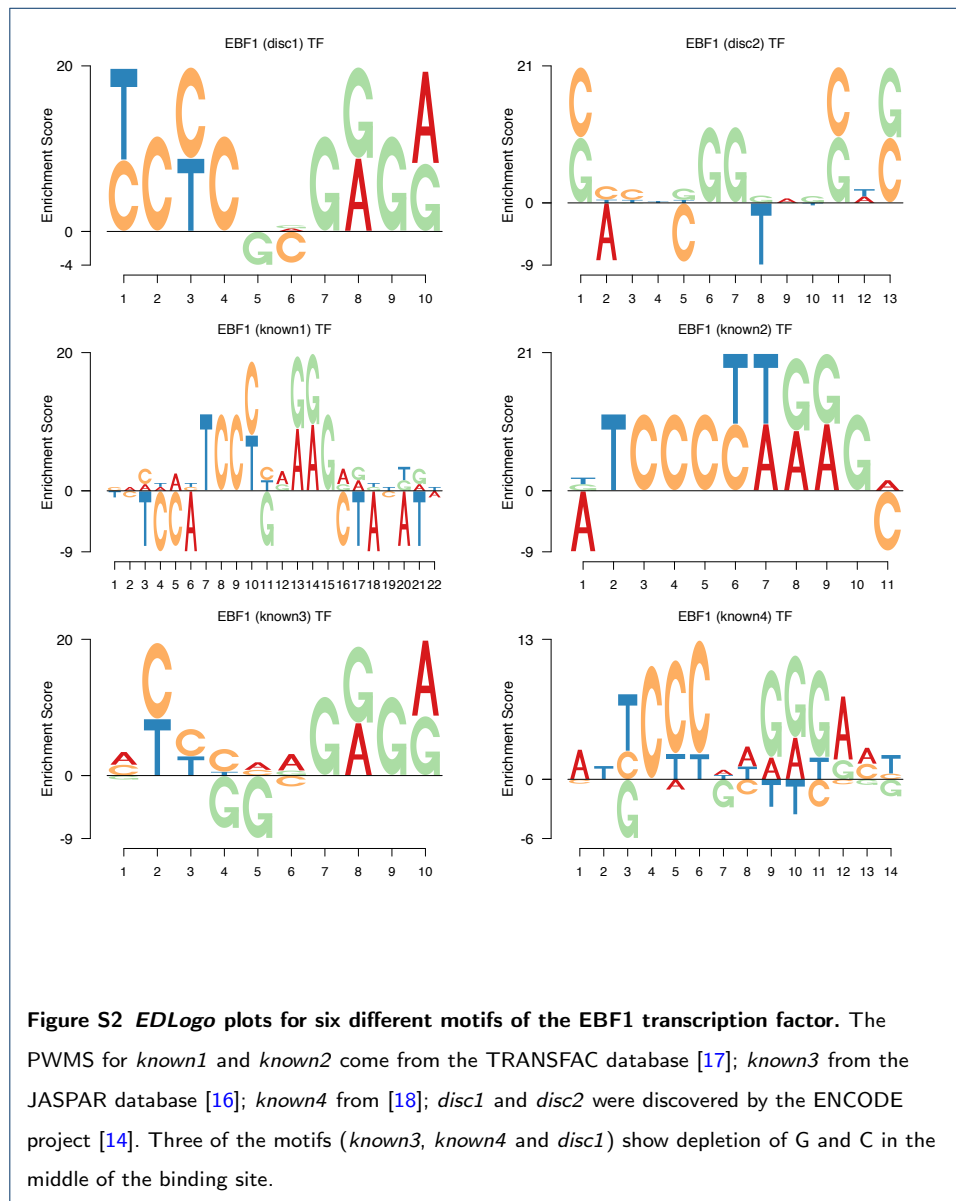

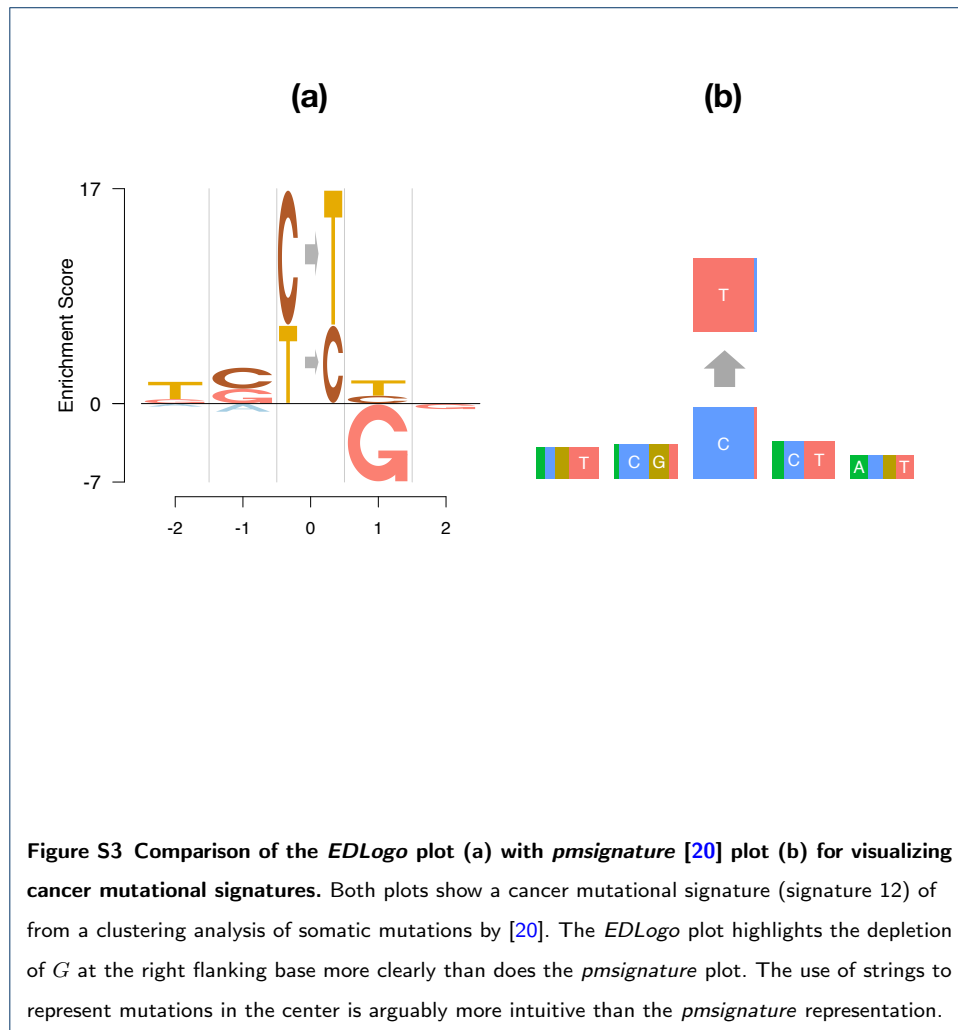

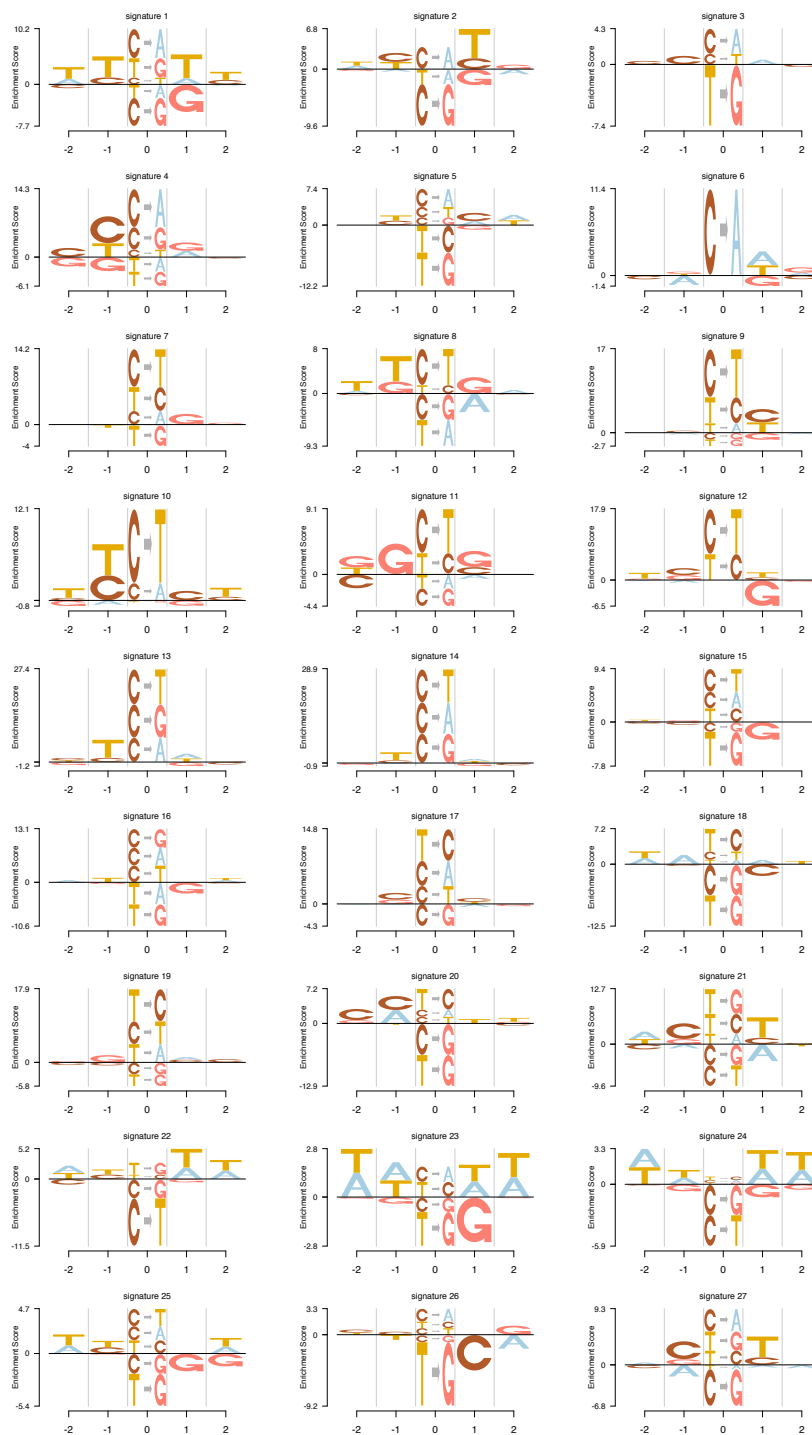

**Figure S4** Illustration of *EDLogo* for all mutation signatures from Shiraishi et al: *EDLogo* plots for the 27 mutation signature profiles estimated by [20] using data from different cancer types. The heights of the strings in the center of each plot ( $C \rightarrow G$ ,  $C \rightarrow T$ , etc at position 0 on  $x$  axis) reflect the relative frequency of each substitution type among somatic mutations contributing to the signature profile, while the heights of the bases at flanking positions on either side reflect the relative frequency of each base at these flanking positions.

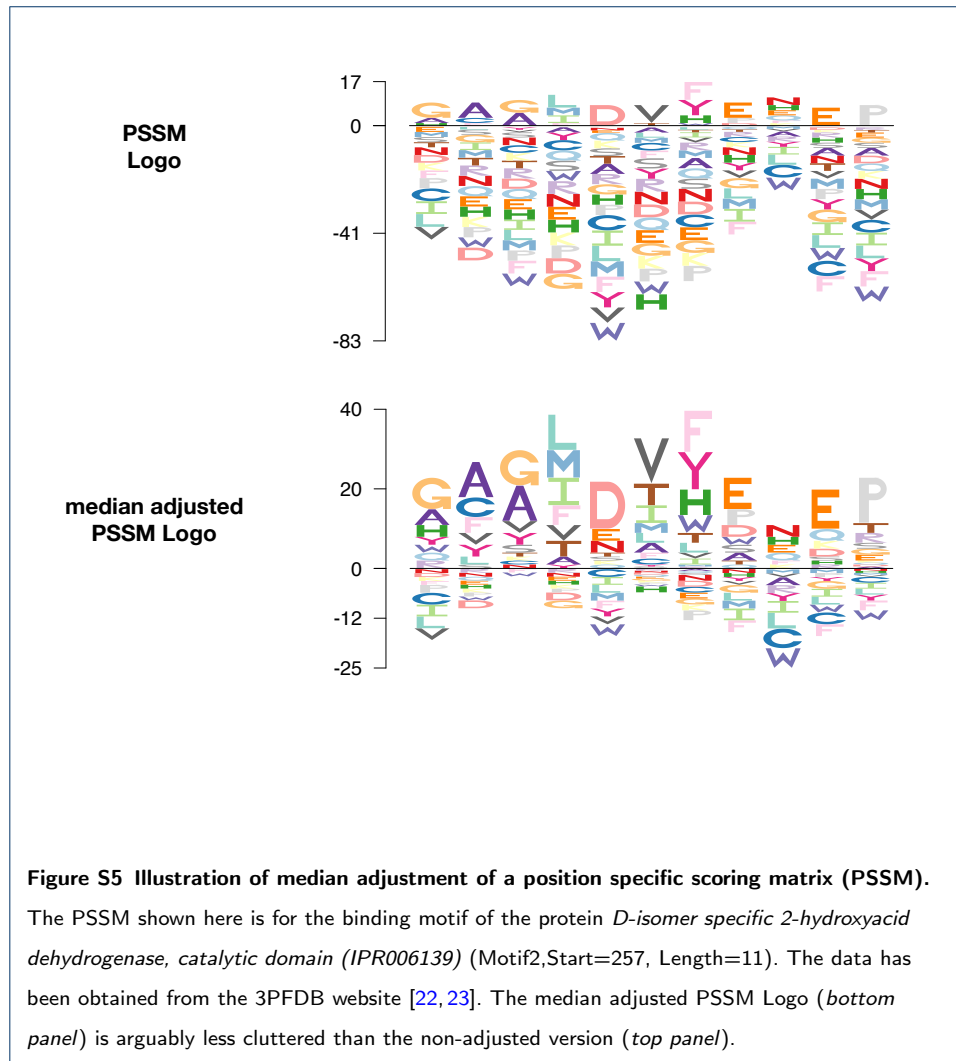

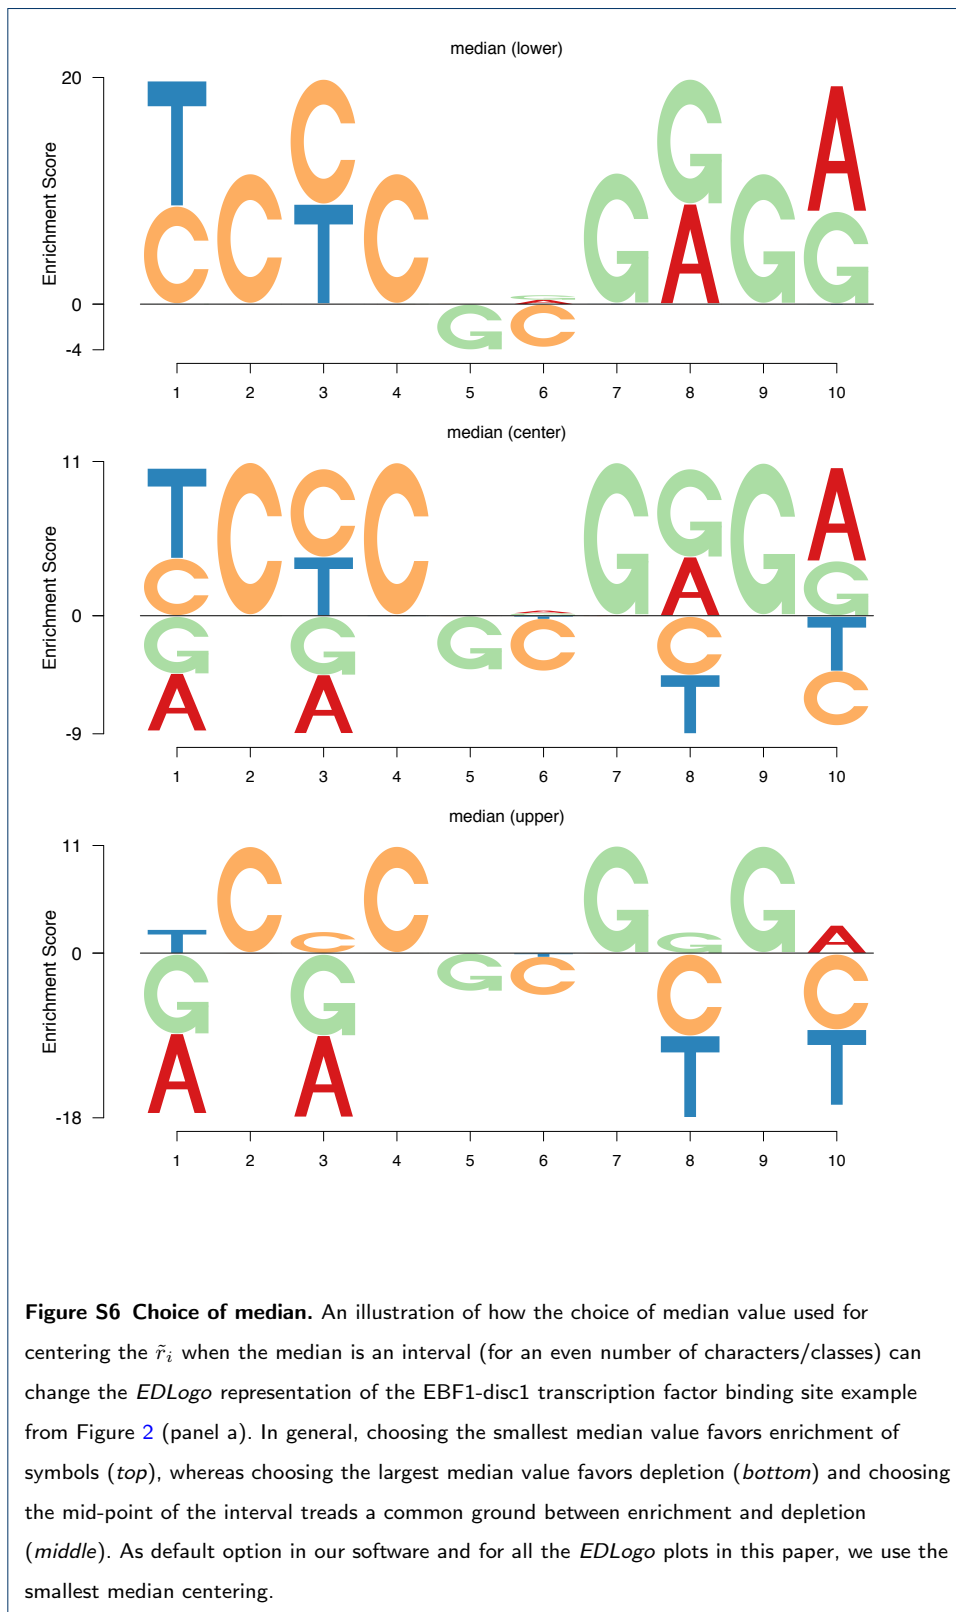

Supplement: 12859_2018_2489_MOESM2_ESM.pdf [file 12859_2018_2489_MOESM2_ESM.pdf]
