# Supplementary material for: A new sequence logo plot to highlight enrichment and depletion
Source: PubMed Central journal article supplement (PMC6288878; doi:10.1186/s12859-018-2489-3), 2018-12-10
Supplement: 12859_2018_2489_MOESM3_ESM.pdf [file 12859_2018_2489_MOESM3_ESM.pdf]

422 **Supplementary Tables**

**Table S1** The position weight matrix (PWM)  $p$  for the EBF1-disc1 transcription factor. The columns represent the base positions and the rows are bases, with each entry of the matrix representing the relative frequency of a base in the position represented by the column. The PWM data has been fetched from <http://compbio.mit.edu/encode-motifs/> [14]. The background probabilities  $q$  were considered equal (all 0.25) for all positions.

|   | 1     | 2 | 3     | 4 | 5     | 6     | 7 | 8     | 9 | 10    |
|---|-------|---|-------|---|-------|-------|---|-------|---|-------|
| A | 0     | 0 | 0     | 0 | 0.298 | 0.336 | 0 | 0.177 | 0 | 0.885 |
| C | 0.153 | 1 | 0.826 | 1 | 0.357 | 0.021 | 0 | 0     | 0 | 0     |
| G | 0     | 0 | 0     | 0 | 0.021 | 0.375 | 1 | 0.823 | 1 | 0.115 |
| T | 0.847 | 0 | 0.174 | 0 | 0.324 | 0.268 | 0 | 0     | 0 | 0     |

**Table S2** Position Weight Matrix for N-linked glycosylation motifs, comprising of the N-linked site and the neighboring bases (5 before and 5 after the N) surrounding it. The data was downloaded from the UniprotKB protein database [19]. Background probabilities were computed by the relative proportion of the median counts of each amino acid over the 11 positions. The effective count for the background probabilities was also taken to be 5422, the number of sequences in the original data.

|   | -5  | -4  | -3  | -2  | -1  | 0    | 1   | 2    | 3   | 4   | 5   |
|---|-----|-----|-----|-----|-----|------|-----|------|-----|-----|-----|
| A | 312 | 311 | 348 | 365 | 385 | 0    | 402 | 2    | 366 | 348 | 355 |
| C | 142 | 147 | 148 | 125 | 145 | 0    | 225 | 14   | 244 | 149 | 212 |
| D | 266 | 272 | 225 | 177 | 196 | 0    | 201 | 1    | 268 | 234 | 320 |
| E | 320 | 393 | 323 | 249 | 280 | 0    | 252 | 3    | 335 | 336 | 376 |
| F | 266 | 226 | 231 | 330 | 267 | 0    | 268 | 2    | 260 | 203 | 229 |
| G | 341 | 325 | 358 | 389 | 450 | 0    | 508 | 1    | 337 | 305 | 310 |
| H | 119 | 137 | 156 | 188 | 136 | 0    | 133 | 0    | 147 | 149 | 130 |
| I | 283 | 242 | 279 | 277 | 272 | 0    | 440 | 1    | 293 | 310 | 311 |
| K | 237 | 228 | 283 | 243 | 257 | 0    | 179 | 0    | 206 | 205 | 204 |
| L | 533 | 594 | 537 | 544 | 566 | 0    | 581 | 4    | 643 | 524 | 484 |
| M | 93  | 94  | 92  | 105 | 100 | 0    | 109 | 2    | 87  | 97  | 73  |
| N | 216 | 257 | 209 | 230 | 181 | 5422 | 187 | 3    | 181 | 225 | 225 |
| P | 325 | 325 | 312 | 322 | 256 | 0    | 10  | 1    | 28  | 344 | 317 |
| Q | 231 | 226 | 260 | 228 | 242 | 0    | 180 | 3    | 241 | 265 | 210 |
| R | 260 | 234 | 267 | 224 | 274 | 0    | 206 | 4    | 242 | 260 | 229 |
| S | 443 | 424 | 414 | 427 | 395 | 0    | 448 | 2365 | 432 | 434 | 388 |
| T | 349 | 356 | 301 | 317 | 284 | 0    | 318 | 3012 | 277 | 369 | 287 |
| V | 390 | 348 | 379 | 370 | 385 | 0    | 494 | 4    | 493 | 401 | 439 |
| W | 91  | 101 | 96  | 82  | 97  | 0    | 62  | 0    | 135 | 75  | 110 |
| Y | 205 | 182 | 204 | 230 | 254 | 0    | 219 | 0    | 207 | 189 | 213 |

**Table S3** The position weight matrix (PWM)  $p$  for mutation signature profile 12 in [20]. The background was chosen to be of equal probability ( $1/4$  for the flanking positions, and  $1/6$  for the mutation at the center, as there are 6 possibilities).

|                |                                                                                                                                                            |
|----------------|------------------------------------------------------------------------------------------------------------------------------------------------------------|
| -2 left flank  | A: 0.143, C: 0.169, G: 0.219, T: 0.469                                                                                                                     |
| -1 left flank  | A: 0.085, C: 0.464, G: 0.317, T: 0.133                                                                                                                     |
| mutation       | $C \rightarrow A : 7e-10$ , $C \rightarrow G : 0$ , $C \rightarrow T : 0.965$ , $T \rightarrow A : 0$<br>$T \rightarrow C : 0.035$ , $T \rightarrow G : 0$ |
| +1 right flank | A: 0.197, C: 0.313, G: 0.002, T: 0.487                                                                                                                     |
| +2 right flank | A: 0.277, C: 0.245, G: 0.193, T: 0.284                                                                                                                     |

**Table S4** The observed distribution of histone marks in different regions of the genome for the lymphoblastoid cell line GM06990, as presented in Table S2 (upper) of [10].

|         | Intergenic | Intron | Exon | Gene start | Gene end |
|---------|------------|--------|------|------------|----------|
| H3K4ME1 | 326        | 296    | 81   | 245        | 71       |
| H3K4ME2 | 258        | 228    | 55   | 273        | 90       |
| H3K4ME3 | 145        | 121    | 29   | 253        | 85       |
| H3AC    | 60         | 52     | 23   | 180        | 53       |
| H4AC    | 150        | 191    | 63   | 178        | 63       |

**Table S5** The background distribution of histone marks in different regions of the genome, as presented in Table S2 (lower) of [10].

|         | Intergenic | Intron | Exon | Gene start | Gene end |
|---------|------------|--------|------|------------|----------|
| H3K4ME1 | 542        | 218    | 118  | 108        | 33       |
| H3K4ME2 | 480        | 204    | 107  | 87         | 26       |
| H3K4ME3 | 346        | 131    | 71   | 66         | 20       |
| H3AC    | 199        | 72     | 41   | 43         | 13       |
| H4AC    | 368        | 101    | 67   | 80         | 30       |

**Table S6** Position Specific Scoring Matrix (PSSM) data for the binding motif of the protein *D-isomer specific 2-hydroxyacid dehydrogenase, catalytic domain (IPR006139)* (Motif2,Start=257, Length=11) [22, 23].

|   | 257 | 258 | 259 | 260 | 261 | 262 | 263 | 264 | 265 | 266 | 267 |
|---|-----|-----|-----|-----|-----|-----|-----|-----|-----|-----|-----|
| A | 2   | 6   | 5   | -2  | -4  | -2  | -4  | 0   | -2  | -3  | -3  |
| R | 0   | -4  | -4  | -5  | -4  | -5  | -3  | -2  | -2  | -2  | -1  |
| N | -3  | -4  | -3  | -5  | -1  | -5  | -5  | -3  | 3   | -3  | -4  |
| D | -3  | -5  | -4  | -6  | 8   | -5  | -5  | 1   | 0   | -1  | -3  |
| C | -5  | 2   | -3  | -4  | -6  | -3  | -5  | -2  | -5  | -6  | -5  |
| Q | 0   | -4  | -4  | -4  | -3  | -5  | -4  | -1  | 2   | 0   | -3  |
| E | -2  | -4  | -4  | -5  | -1  | -5  | -5  | 6   | 2   | 7   | -2  |
| G | 6   | -3  | 5   | -6  | -4  | -5  | -5  | -4  | 0   | -5  | -2  |
| H | 1   | -4  | -4  | -5  | -4  | -6  | 3   | -3  | 2   | -2  | -4  |
| I | -5  | -3  | -4  | 3   | -6  | 0   | -2  | -5  | -3  | -5  | -5  |
| L | -5  | -1  | -4  | 5   | -6  | -2  | -1  | -4  | -4  | -5  | -5  |
| K | -3  | -4  | -3  | -5  | -3  | -5  | -5  | -2  | 1   | -1  | -3  |
| M | -2  | -3  | -4  | 3   | -6  | -2  | -3  | -4  | -1  | -4  | -4  |
| F | -3  | 1   | -5  | 1   | -6  | -3  | 7   | -5  | 1   | -6  | -6  |
| P | -4  | -4  | -4  | -5  | -4  | -5  | -6  | 2   | 0   | -4  | 8   |
| S | -2  | -2  | -2  | -4  | -3  | -4  | -4  | 0   | 0   | -2  | -2  |
| T | -2  | -3  | -3  | 0   | -3  | 1   | -1  | -1  | 0   | -3  | -1  |
| W | 0   | -4  | -5  | -4  | -7  | -5  | 1   | 0   | -5  | -5  | -6  |
| Y | 0   | 0   | -1  | -3  | -6  | -4  | 6   | -3  | -2  | -4  | -5  |
| V | -5  | 0   | -1  | 0   | -6  | 7   | -2  | -3  | -1  | -3  | -4  |
